# Supplementary material for: A quinoline–benzothiazole-based chemosensor coupled with a smartphone for the rapid detection of In3+ ions
Source: Royal Society of Chemistry journal article supplement (doi:10.1039/d1ay01767e), 2021-12-28
Supplement: d1ay01767e1.pdf [file d1ay01767e1.pdf]

## Supporting Information

### A quinoline-benzothiazole based chemosensor coupled with smart phone for rapid detection of $\text{In}^{3+}$

Leyana K. Shaji and S.K. Ashok Kumar\*

Department of Chemistry, School of Advanced Sciences, Vellore Institute of Technology,  
Vellore – 632 014, Tamil Nadu, India. Email: [ashokkumar.sk@vit.ac.in](mailto:ashokkumar.sk@vit.ac.in)

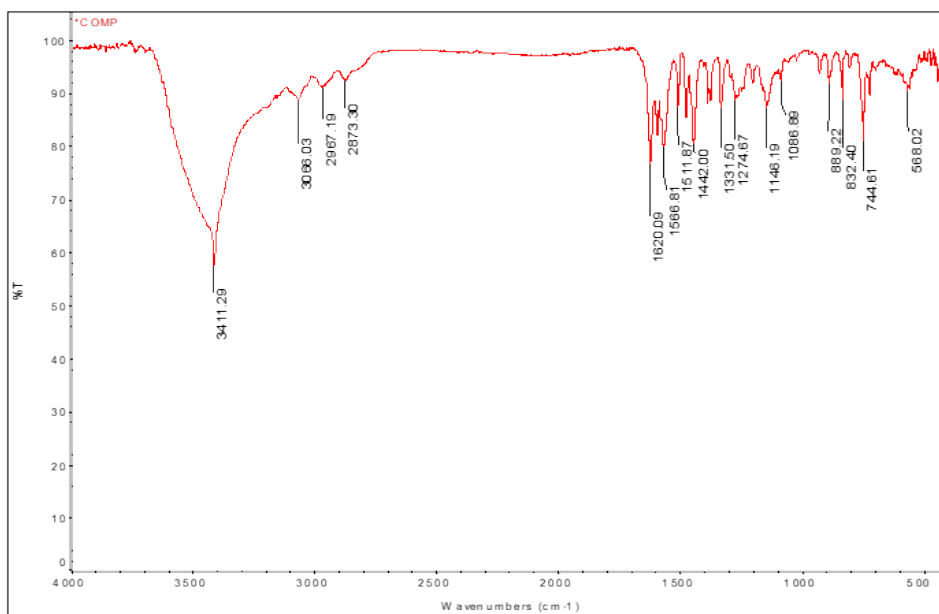

Fig. 1S. FT-IR spectrum of L

Signature SIF VIT VELLORE  
L6-5

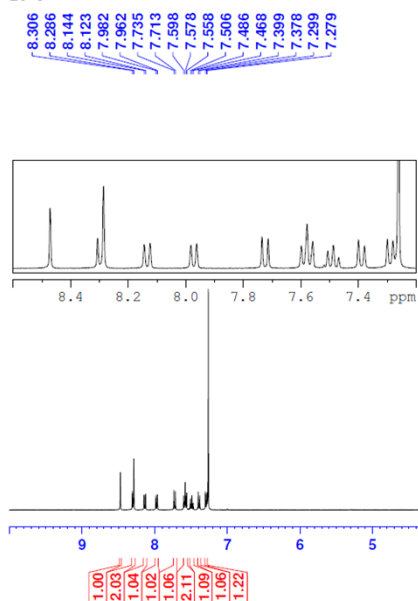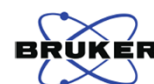

Current Data Parameters  
NAME Dr.ASK050221  
EXPTNO 24  
PROCNO 1

F2 - Acquisition Parameters  
Date\_ 20210206  
Time 3.22 h  
INSTRUM spect  
PROBHD Z108618\_0505 ( (   
PULPROG zg30  
TD 65536  
SOLVENT CDCl3  
NS 32  
DS 2  
SWH 8012.820 Hz  
FIDRES 0.244532 Hz  
AQ 4.0394465 sec  
RG 199.6  
DW 62.400 usec  
DE 6.50 usec  
TE 310.3 K  
D1 1.00000000 sec  
TDO 1  
SFO1 400.2604716 MHz  
NUC1 1H  
P1 14.07 usec  
PLW1 16.00000000 W

F2 - Processing parameters  
SI 65536  
SF 400.2580095 MHz  
WDW EM  
SSB 0  
LB 0.30 Hz  
GB 0  
PC 1.00

Fig. 2S.  $^1\text{H}$  NMR spectrum of L

Signature SIF VIT VELLORE  
L6-6

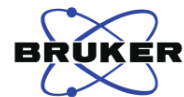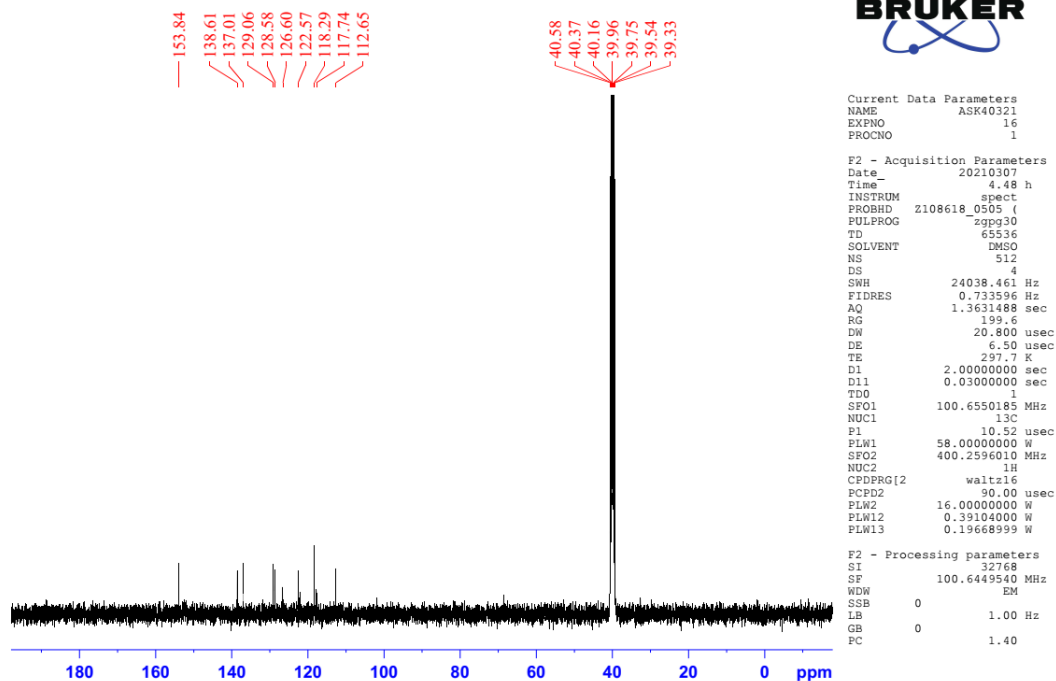

Fig. 3S. <sup>13</sup>C NMR spectrum of L

X:\Data\2018\SEPT2020-APRIL-2020\L6-HY

05-03-2021 16:20:30

L6-HY #67 RT: 1.31 AV: 1 NL: 1.42E7  
T: FTMS (1,1) + p ESI Full ms [100.00-1500.00]

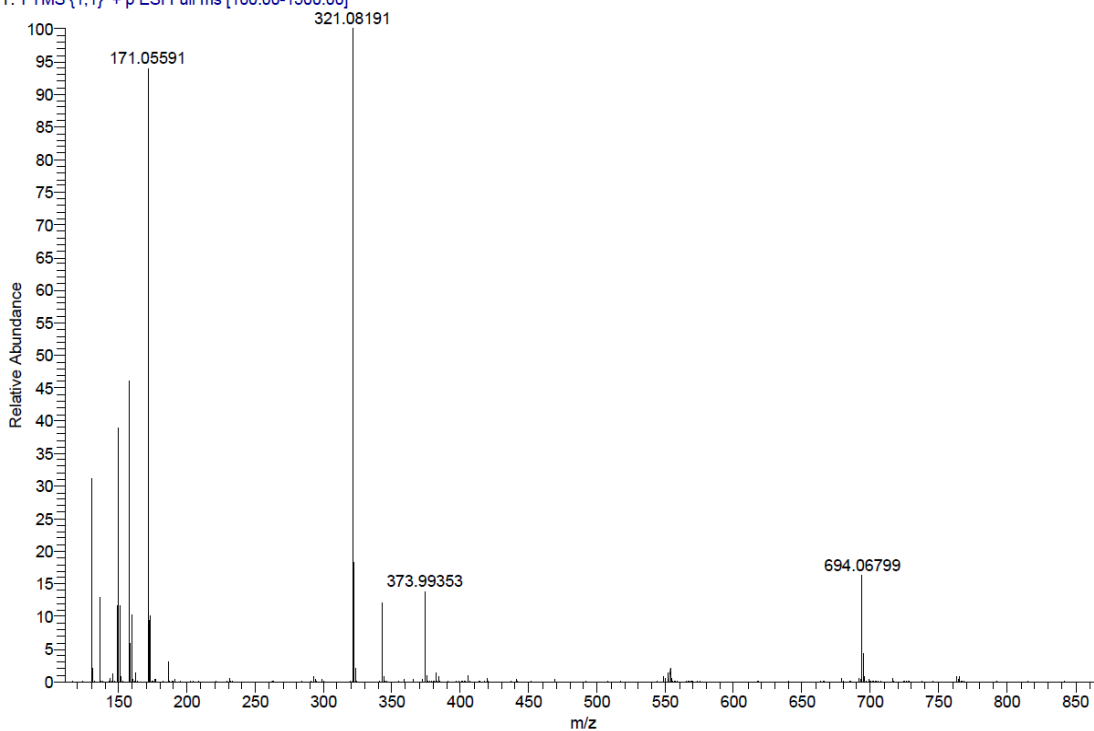

Fig. 4S. HR-MS spectrum of L

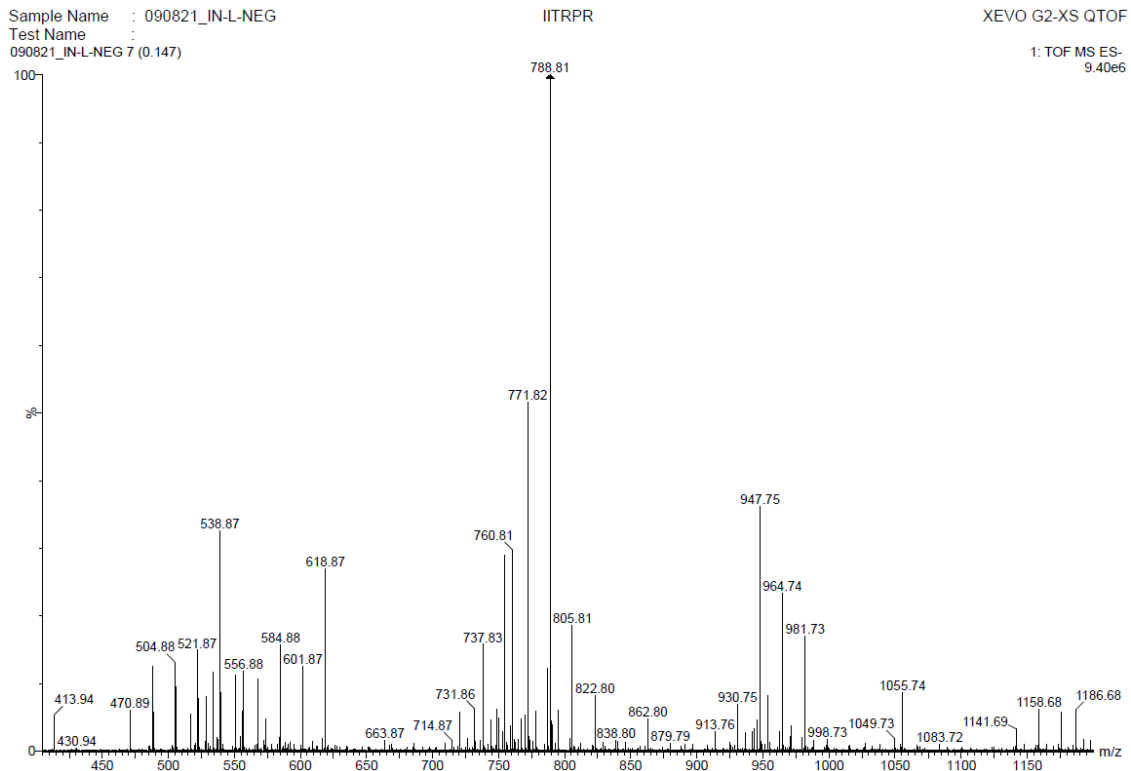

Fig. 5S. ESI-MS spectrum of  $L+In^{3+}$

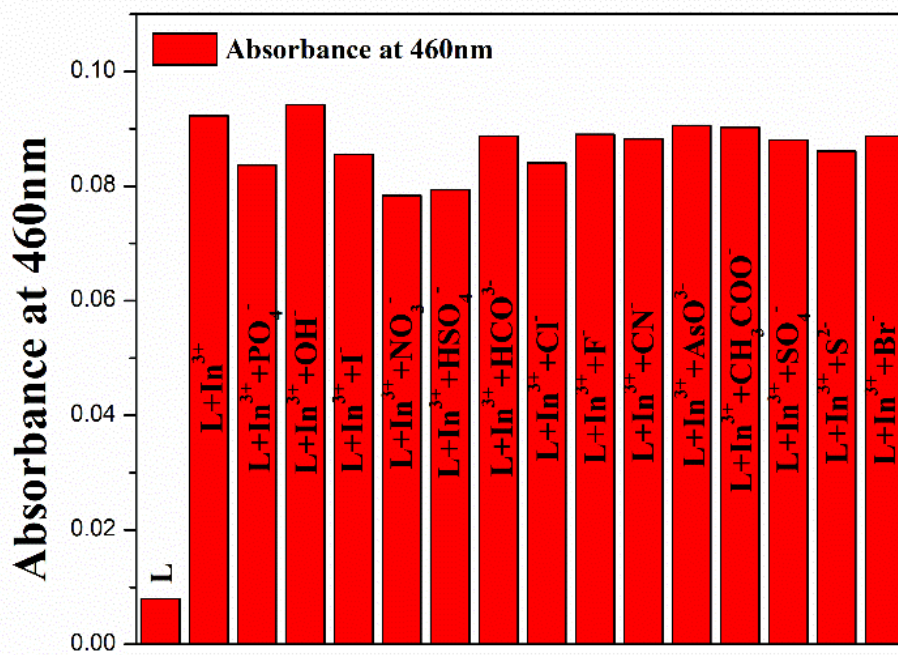

Fig. 6S. Bar diagrams depicting the effect of various interfering anions analytes

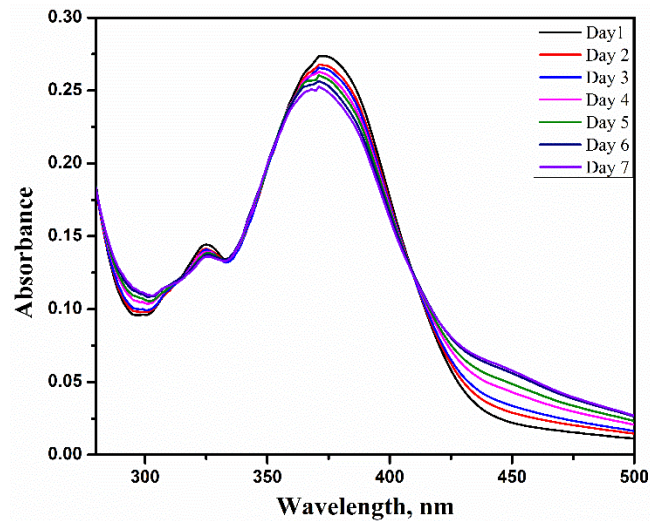

**Fig. 7S.** Stability Test of L performed by UV-vis spectral response for seven days

**Table 1S.** Comparison of present probe with previously reported probes for In<sup>3+</sup> ions recognition

| Structure of the probe                                                                                     | Method                  | LOD     | Medium                      | Additional species detected                                             | Application                                |
|------------------------------------------------------------------------------------------------------------|-------------------------|---------|-----------------------------|-------------------------------------------------------------------------|--------------------------------------------|
| 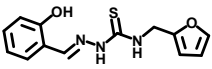<br>[41]                  | Ratiometric fluorescent | 2.68 μM | Near aqueous                | -                                                                       | Real sample analysis and live cell imaging |
| <br>[42]                  | fluorimetric            | 29 nM   | DMF/H <sub>2</sub> O (9:1)  | Zn <sup>2+</sup> & Ppi in ACN<br>Fluorimetric                           | Real sample analysis                       |
| <br>[43]                  | fluorimetric            | 9.62 μM | aqueous                     | -                                                                       | Real sample analysis                       |
| <br>[44]                  | fluorimetric            | 1.02 nM | DMF/H <sub>2</sub> O (9:1)  | Zn <sup>2+</sup><br>(EtOH:H <sub>2</sub> O)<br>Fluorimetric             | Real sample analysis                       |
| <br>[45]                 | fluorimetric            | 5.89 μM | CH <sub>3</sub> CN          | Fe <sup>3+</sup><br>(colorimetric)                                      | NA                                         |
| <br>[46]                | fluorimetric            | 0.05 μM | MeOH/H <sub>2</sub> O (1:1) | Zn <sup>2+</sup> , ClO <sup>-</sup><br>(fluorimetric)<br>(colorimetric) | Real sample analysis                       |
| <br>[47]                | fluorimetric            | 0.53 μM | DMF                         | Fe <sup>3+</sup><br>(colorimetric)                                      | NA                                         |
| <br>[48]                | fluorimetric            | 0.04 μM | DMF/H <sub>2</sub> O (9:1)  | Ppi (secondary sensor)                                                  | Real sample analysis                       |
| <br>[4]                 | fluorimetric            | 7.92 μM | MeOH                        | Ga <sup>3+</sup> , Al <sup>3+</sup><br>(fluorimetric)                   | NA                                         |
| <br><b>Present Work</b> | colorimetric            | 0.2 μM  | DMSO                        | Nil                                                                     | Test strip                                 |

**Table 2S.** Comparison of experimental and theoretical excitation spectral studies.

| <b>Code</b>              | <b>Abs<br/>(nm)</b> | <b>Mol. Abs<br/>(L m<sup>-1</sup>cm<sup>-1</sup>)</b> | <b>Wavelength<br/>max(nm)</b> | <b>Oscillator<br/>strength<br/>(f)</b> | <b>Transition</b>              | <b>Orbital Contribution</b> |
|--------------------------|---------------------|-------------------------------------------------------|-------------------------------|----------------------------------------|--------------------------------|-----------------------------|
| <b>L</b>                 | 360                 | 13500                                                 | 372.28                        | 0.3957                                 | S <sub>0</sub> →S <sub>2</sub> | H-1→L 86%, H→L 10%          |
| <b>L-In<sup>3+</sup></b> | 450                 | 9200                                                  | 480.26                        | 0.239                                  | S <sub>0</sub> →S <sub>3</sub> | H-1→L 50%, H→L+1<br>48%     |

\*H – HOMO, L – LUMO orbitals

\*\*\*
